# Supplementary material
Source: publisher site journal article supplement (https://www.dovepress.com/article/404396)
Supplement: Supplementary file 1 [file get_supplementary_file.php]

# Supplementary Material

# Supplementary Method

**Inclusion/exclusion criteria for participants and Sample Collection**

The study was approved by Jiangsu Province Hospital of Chinese Medicine, Affiliated Hospital of Nanjing University of Chinese Medicine, Ethics and Research Committee (approval number: 2019NL-166-02). All patient records/information was anonymized and de-identified prior to analysis. Each sample was collected frozen and immediately stored in liquid nitrogen. Inclusion criteria: (1) All patients were diagnosed as HCC for the first time by pathology. (2) Patients with HCC who were hospitalized in Jiangsu Province Hospital of Chinese Medicine from 2020-01-01 to 2022-05-01. Also, pathological specimens from each patient were kept for independent re-diagnostic confirmation by two doctors. (3) All patients had complete clinical information. Exclusion criteria: (1) Patients with a clinical diagnosis of a tumor that has metastasized to the Liver from another site. (2) Exclusion of any other serious chronic disease or other visceral tumors. (3) Incomplete clinical data. Finally, a total of 40 patients with HCC were analyzed.

**Cell Culture**

Human hepatocarcinoma cell lines HepG2 (Cat: CL-0103), Hep 3B2.1-7 (Cat: CL-0102), HuH-7 (Cat:CL-0120), HuH-6 (Cat:CL-0119) and Li-7 (Cat: CL-0139) came from a single supplier, Wuhan Pu-nuo-sai Life Technology Co. Ltd. (Wuhan, China). They were cultivated in Dulbecco’s modified Eagle’s medium (DMEM) supplemented with 10% Fetal bovine serum (FBS). All the cells were maintained in a humidified 5% CO2 atmosphere at 37°C.

**RNAi plasmids construction and transfection**

The plasmids described below were all constructed by GeneChem (Shanghai, China). The procedures for constructing RNAi plasmids are described in the Supplementary material. From three short hairpin interfering RNA (shRNA) targeting *PSMD13*, we selected the one with the highest inhibitory efficiency for the subsequent experiments. The *sh-PSMD13* and the control (NC) non-targeting sequence plasmid were transfected into 70%-confluent HepG2 cells using Lipofectamine 3000 per provided protocols.

**Wound healing assay**

Wound-healing experiments with HepG2 and Hep 3B2.1-7 cells were used to assess migration capacity. The cells were grown to confluence in serum-free media in 6-well plates for 24 hours using a cell concentration of 4×105 per well. Following the removal of the medium, the cell layer was scraped with a 10 μL pipette tip. Wound healing was evaluated at 0, 12, and 24 hours using an inverted fluorescent microscope (Olympus CKX-41, Japan) at a magnification of about 200×.

**Colony formation assays**

Briefly, 500 cells were seeded into a 6-well plate and grown for about 14 days. After staining colonies (>5 cells per colony) at 20-25 °C with 0.5% crystal violet (CV) for 10 minutes, we counted the colonies using compound light microscopy (Olympus BX53, Japan).

**Sphere formation**

Sphere formation was examined as previously described[1]. Single-cell suspensions were plated in 6-well ultralow attachment plates (5 × 103cells/well) and grown in serum-free medium with Human recombinant Fibroblast growth factor (FGF) (20 ng/ml), Human recombinant Epidermal Growth Factor (EGF) (20 ng/ml), and 2% B27. The numbers and sizes of the spheres were determined after seven days under light microscopy (Olympus BX53, Japan).

**Transwell assay**

About 50,000 cells were seeded in the top 24-well Transwell chambers with 200 μL of DMEM. As a chemoattractant, the bottom compartment has been filled with 500 μL medium containing 10% FBS. The Transwell chambers were coated with Matrigel. After 24 hours in co-culture, the Transwell top chambers were washed with 1% PBS. Thereafter, the chambers were fixed in 4% paraformaldehyde for 15 minutes before being stained with 0.1% CV. light microscope (Olympus BX53-Japanese), was utilized to take photographs of the cells that had made their way into the lower chambers, and ImageJ was used to determine the total number of cells that were captured in the photographs.

**Western blotting (WB)**

Herein, the WB was established by using the procedure reported in a previous study[2]. The cells were lysed in RIPA buffer, and the protein concentration was determined using the Bradford assay. Samples weighing 20 µg each were separated using SDS-PAGE at 10% or 8%. Polyvinylidene fluoride (PVDF) membrane protein transfer was blocked with 5% bovine serum albumin (BSA). The blots were then probed with the appropriate primary antibodies at 4 °C overnight. After three washes in Tris-buffered saline containing 0.05% Tween-20, the blots were incubated with the corresponding secondary antibodies. The protein β-actin served as a reference.

**Xenograft tumor model**

All animal experiments were approved by the ethics committee at the Jiangsu Province Hospital of Traditional Chinese Medicine and conducted in accordance with the "Guide for the Care and Use of Laboratory Animals" (NIH Publications No. 8023, revised 1996) (2021DW-42-02). Nude male BALB/c mice, aged 4 weeks, were purchased from the Beijing Institute of Biomedicine (Beijing, China) (Certificate No. SYXK2019-0010). The right armpit of mice received subcutaneous injections of HepG2 cells transfected with *sh-PSMD13*, and NC cells at a dose of (1 × 107 cell/mouse). After a period of seven days, the presence of tumors was observed. Thereafter, the maximum and minimum tumor diameters were recorded twice weekly. 35 days after inoculation, the mice were euthanized by CO2, and the sera and tumors were removed. The euthanasia was performed in accordance with the American Veterinary Medical Association (AVMA's) Guidelines for Humane Animal Euthanasia [3]. The volume of the tumor was determined using the formula V = 1/2ab2, and growth curves for the tumor were drawn.

**Immunohistochemical staining (IHC) staining**

Immunohistochemical staining was performed as described by[4]. All concentrations were either those recommended by the manufacturer or those reported in previous studies. After tissue sections were treated with a protein-blocking solution, the slides were incubated with primary antibodies. The IHC data were evaluated for staining intensity and coverage by two different observers. The images were captured using a NIKON Eclipse Ni-E microscope (NIKON, Japan). Positive staining was rated as 0, faint staining as 1, moderate staining as 2, and strong staining as 3. Grading for staining intensity was performed as follows: 0 for no staining, 1 for 10% or less, 2 for 10% to 50%, and 3 for more than 50%, positively stained cells in each specimen. A histochemistry score (H-SCORE) was calculated as follows: H-SCORE= (PI I) = (weakly intense cells% 1) + (moderately intense cells% 2) + (very intense cells% 3). In the equation, I stand for staining intensity and PI stands for the proportion of positive cells to all other cells in a particular field.

# Supplementary Figures

**Figure S1.**


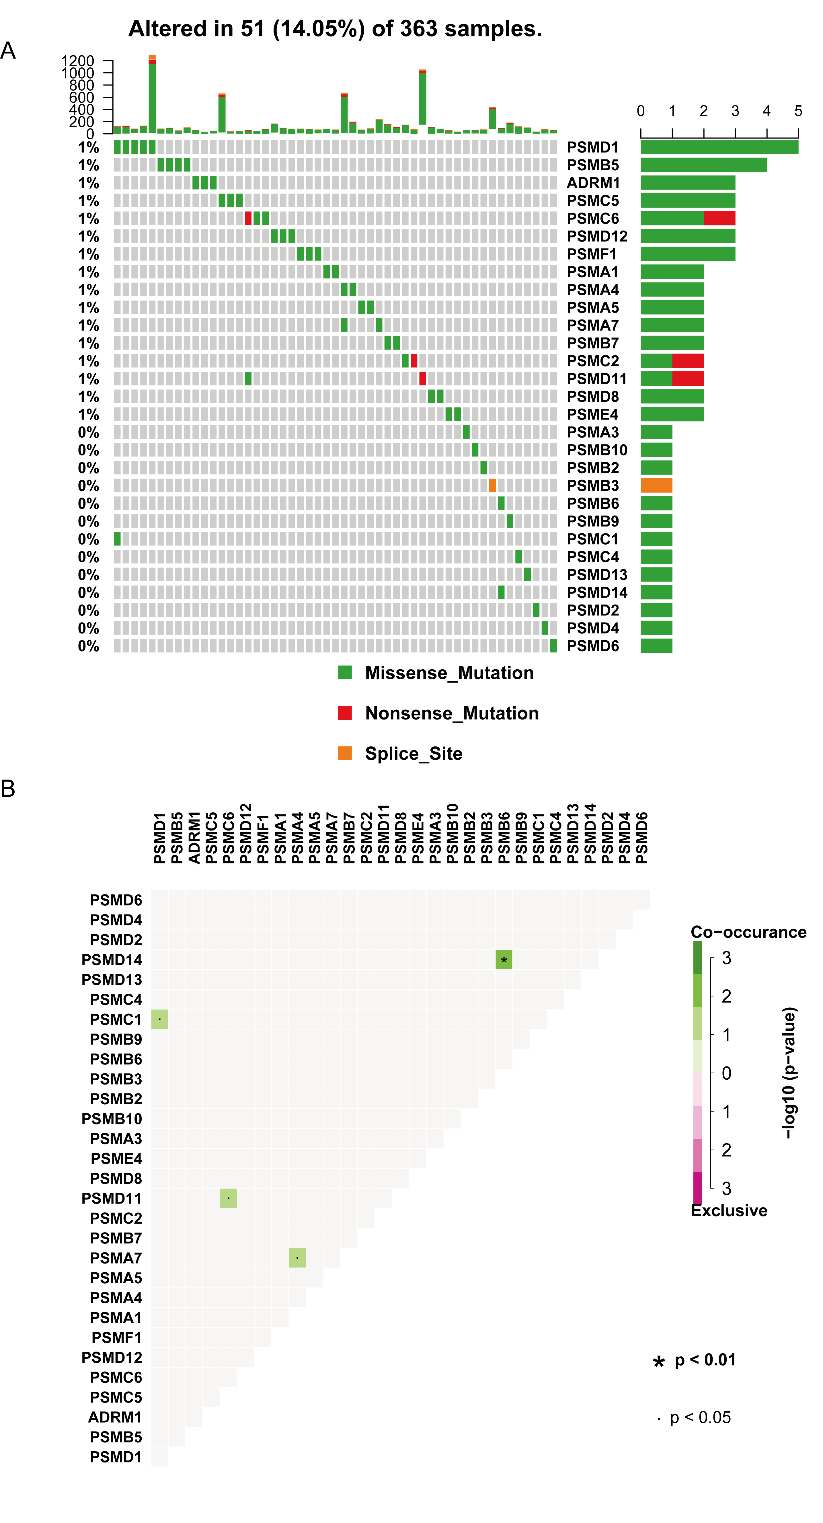


Figure S1. Mutation landscape of PSM related genes in HCC. (A) Oncoplot showing mutation frequency of 45 PSM related genes in 363 patients with HCC in the TCGA-LIHC cohort. Each column represents an individual patient. (B) Graphs showing mutually exclusive and co-occurrence of mutational events in PSM related genes; green indicates co-mutation, red indicates mutex-mutation, the asterisk indicates P value (*P <0.01, •P <0.05).

**Figure S2.**


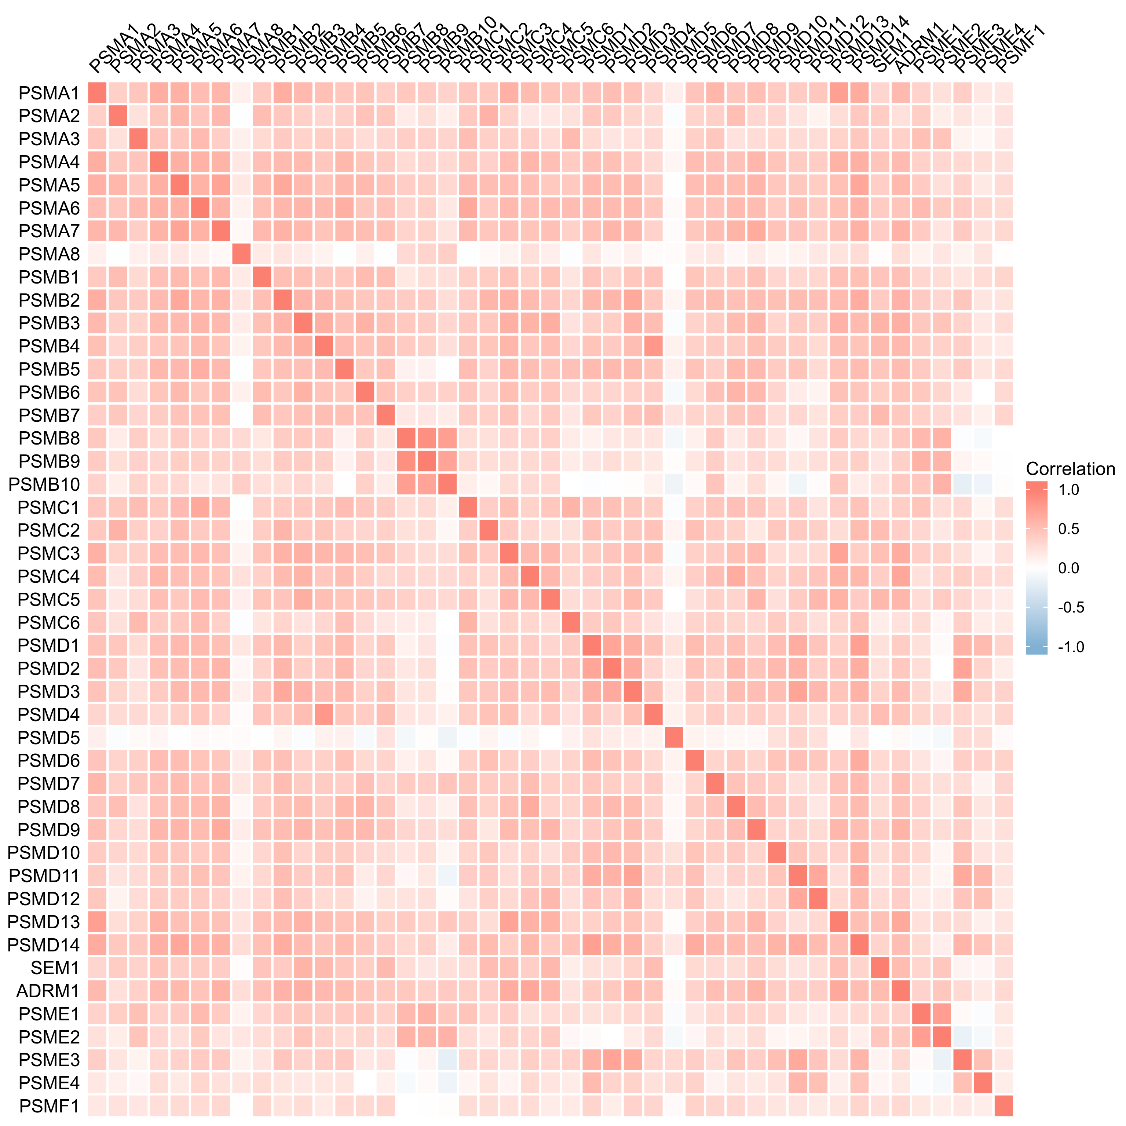


Figure S2. Heatmap showing spearman correlation among the expression levels of 45 PSM molecules based on International Cancer Genome Consortium (ICGC). Red represents positive correlation; blue represents negative correlation.

**Figure S3.**

**
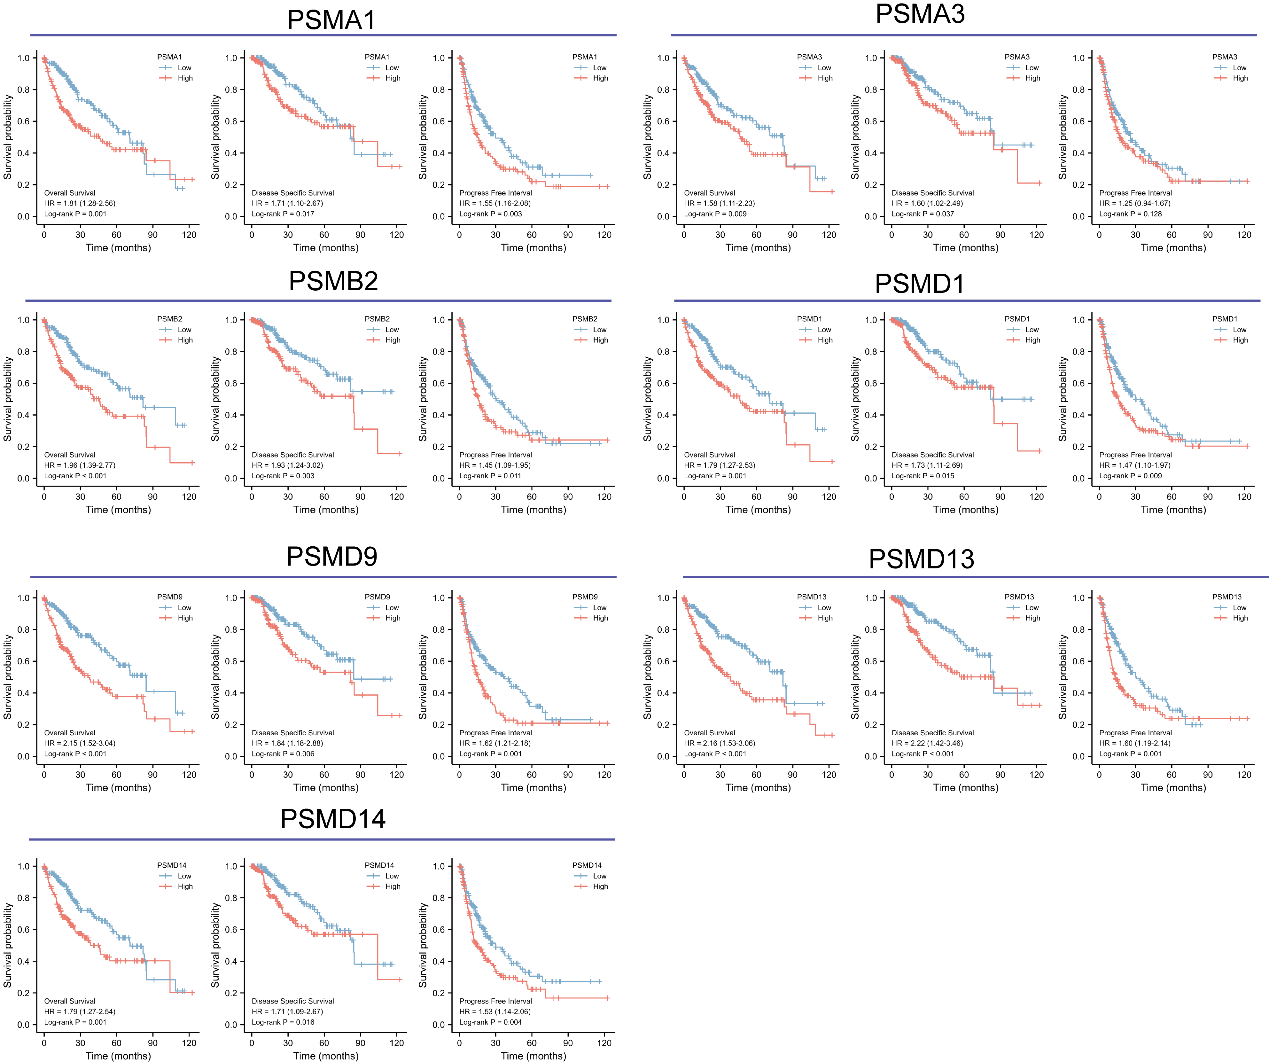
**

Figure S3. Kaplan-Meier plots showing distinct Overall survival (OS), Disease Specific Survival (DSS) and Progression Free Interval (PFI) outcomes between the high- and low-PSM molecules expression groups in TCGA cohort.

**Figure S4.**


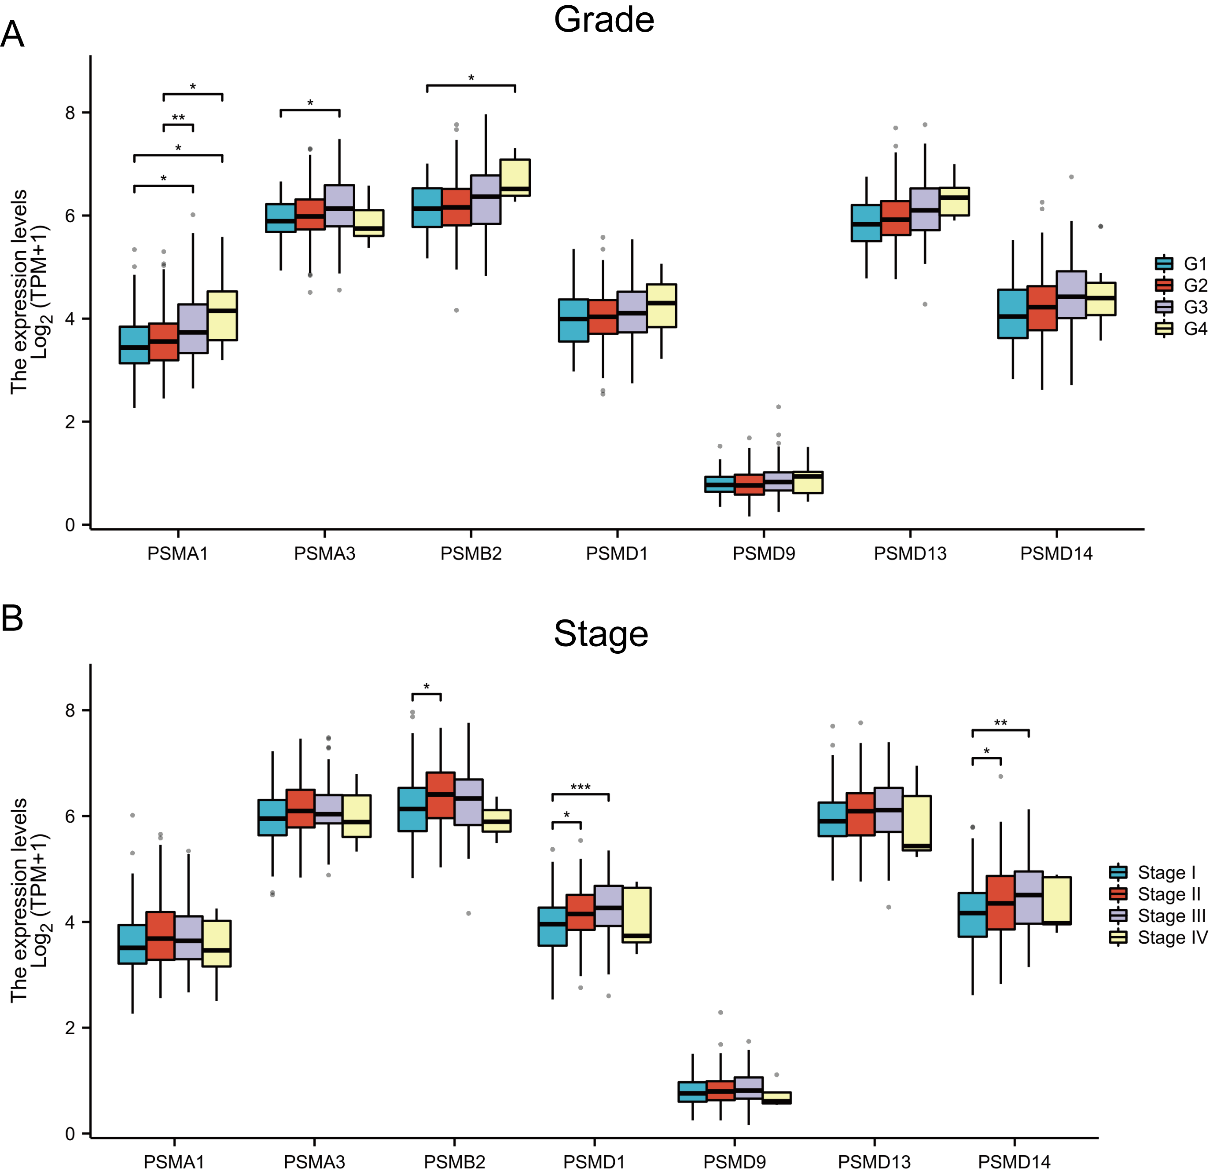


Figure S4. Box plots showing association of the 7 candidate PSM mRNA expression with histological grade (A) and pathologic stage (B) of HCC patients (TCGA-LIHC, n = 369, Wilcoxon test, * P < 0.05, ** P < 0.01, *** P < 0.001).

**Figure S5**


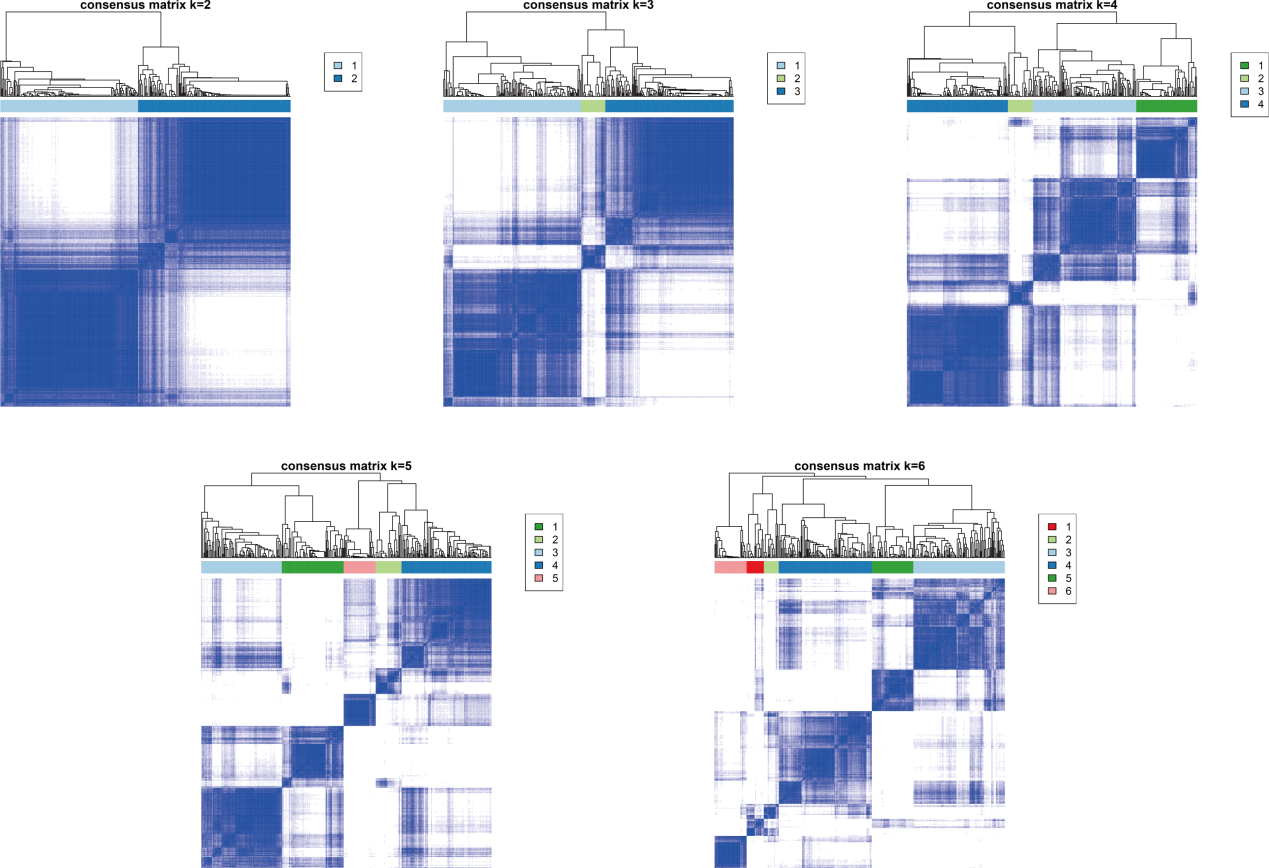


Figure S5. The consensus score matrix of all samples when k = 2–6 (TCGA-LIHC).

**Figure S6.**


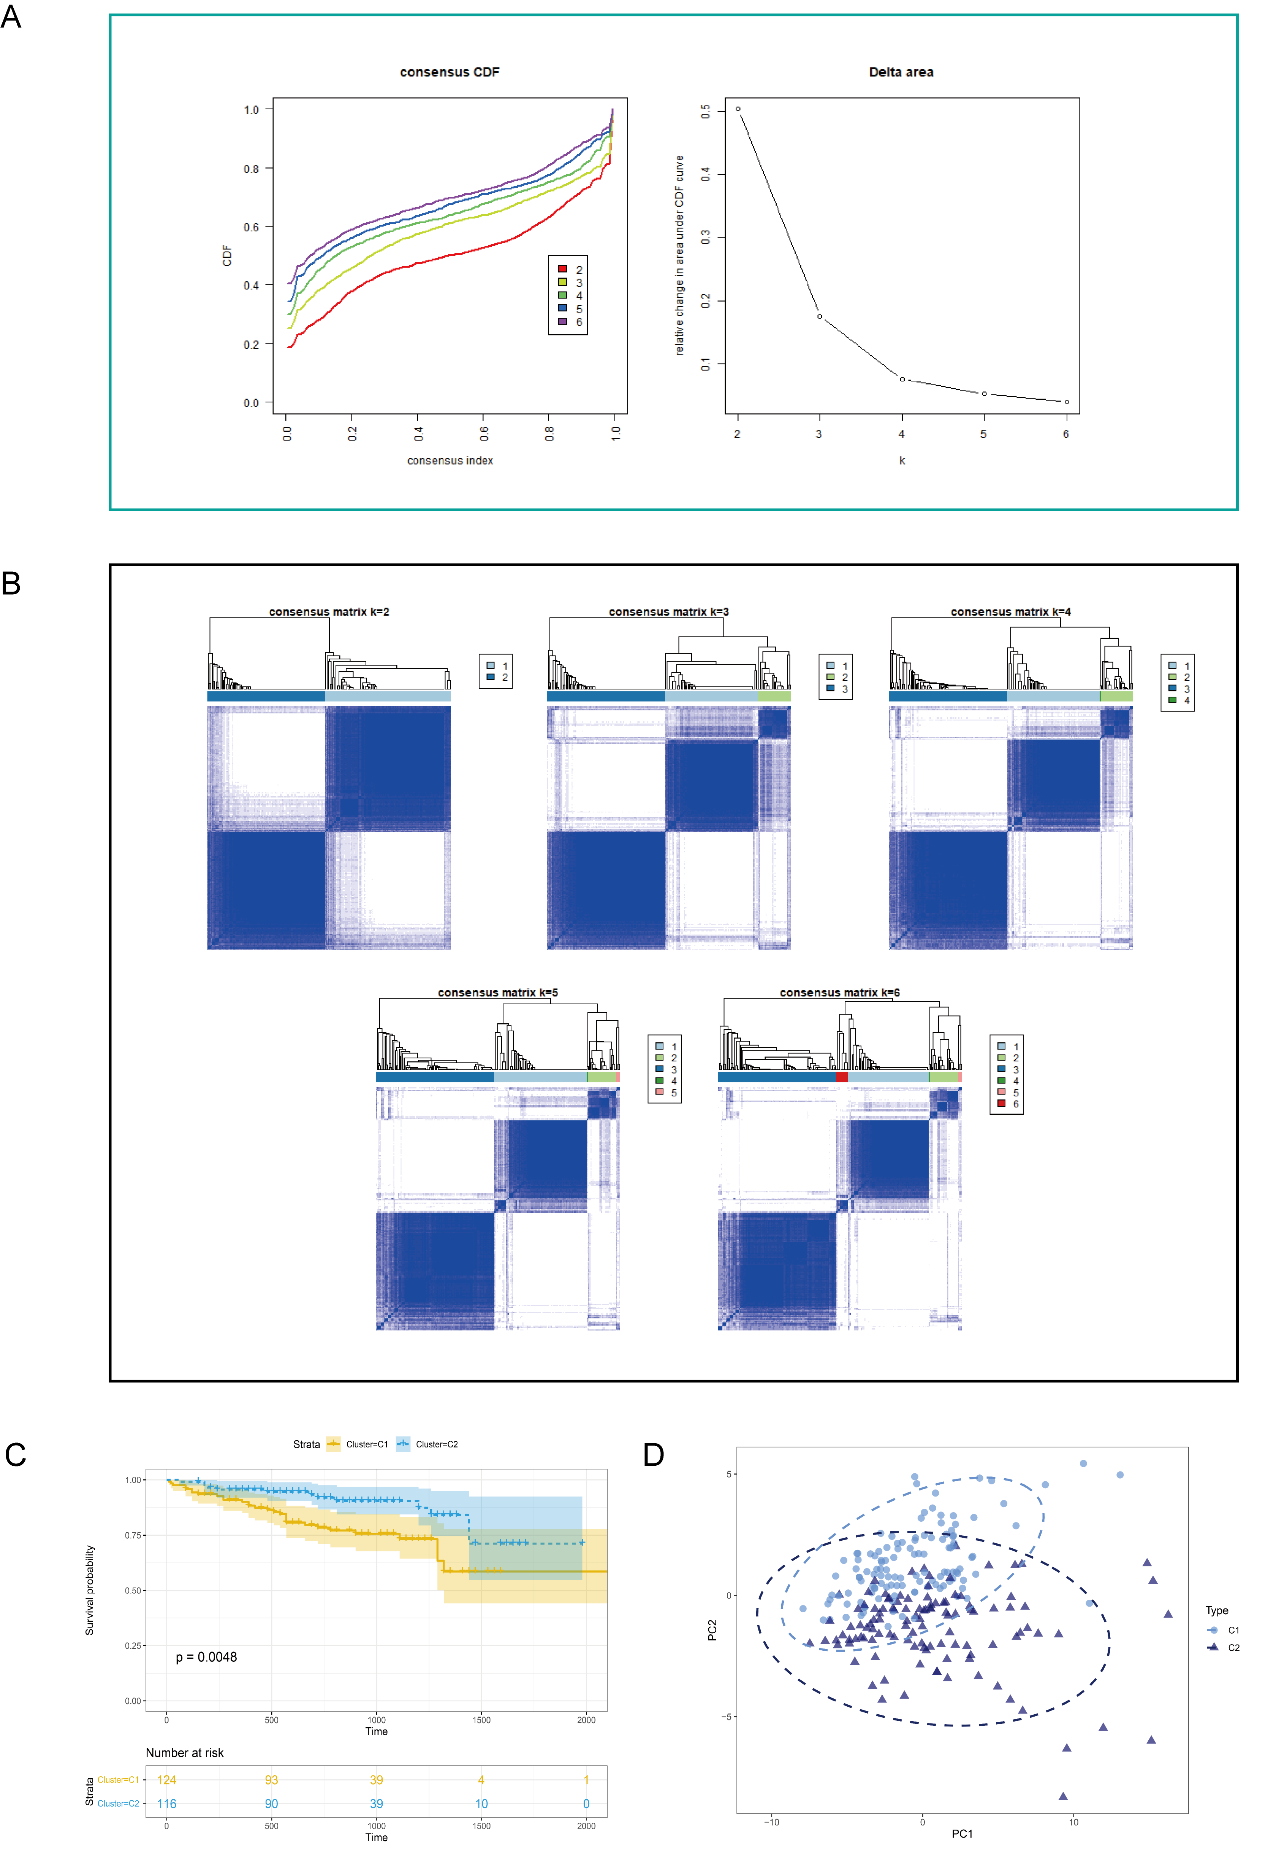


Figure S6. Unsupervised Machine Learning algorithms was used to identify 2 molecular subtypes in ICGC. (A) Left: The cumulative distribution function (CDF) curves in consensus cluster analysis. CDF curves of consensus scores by different subtype numbers (k = 2, 3, 4, 5, and 6) were displayed. Right: Relative change in area under the CDF curve for k = 2–6. (B) The consensus score matrix of all samples when k = 2-6 based on ICGC. (C) Overall Survival (OS) based on two clusters (Logrank test, ICGC: n = 240). (D) The Principal Component Analysis (PCA) distribution of ICGC samples by expression profile of PSM. Each point represents a single sample; different colors represent C1 and C2 respectively.

**Figure S7.**


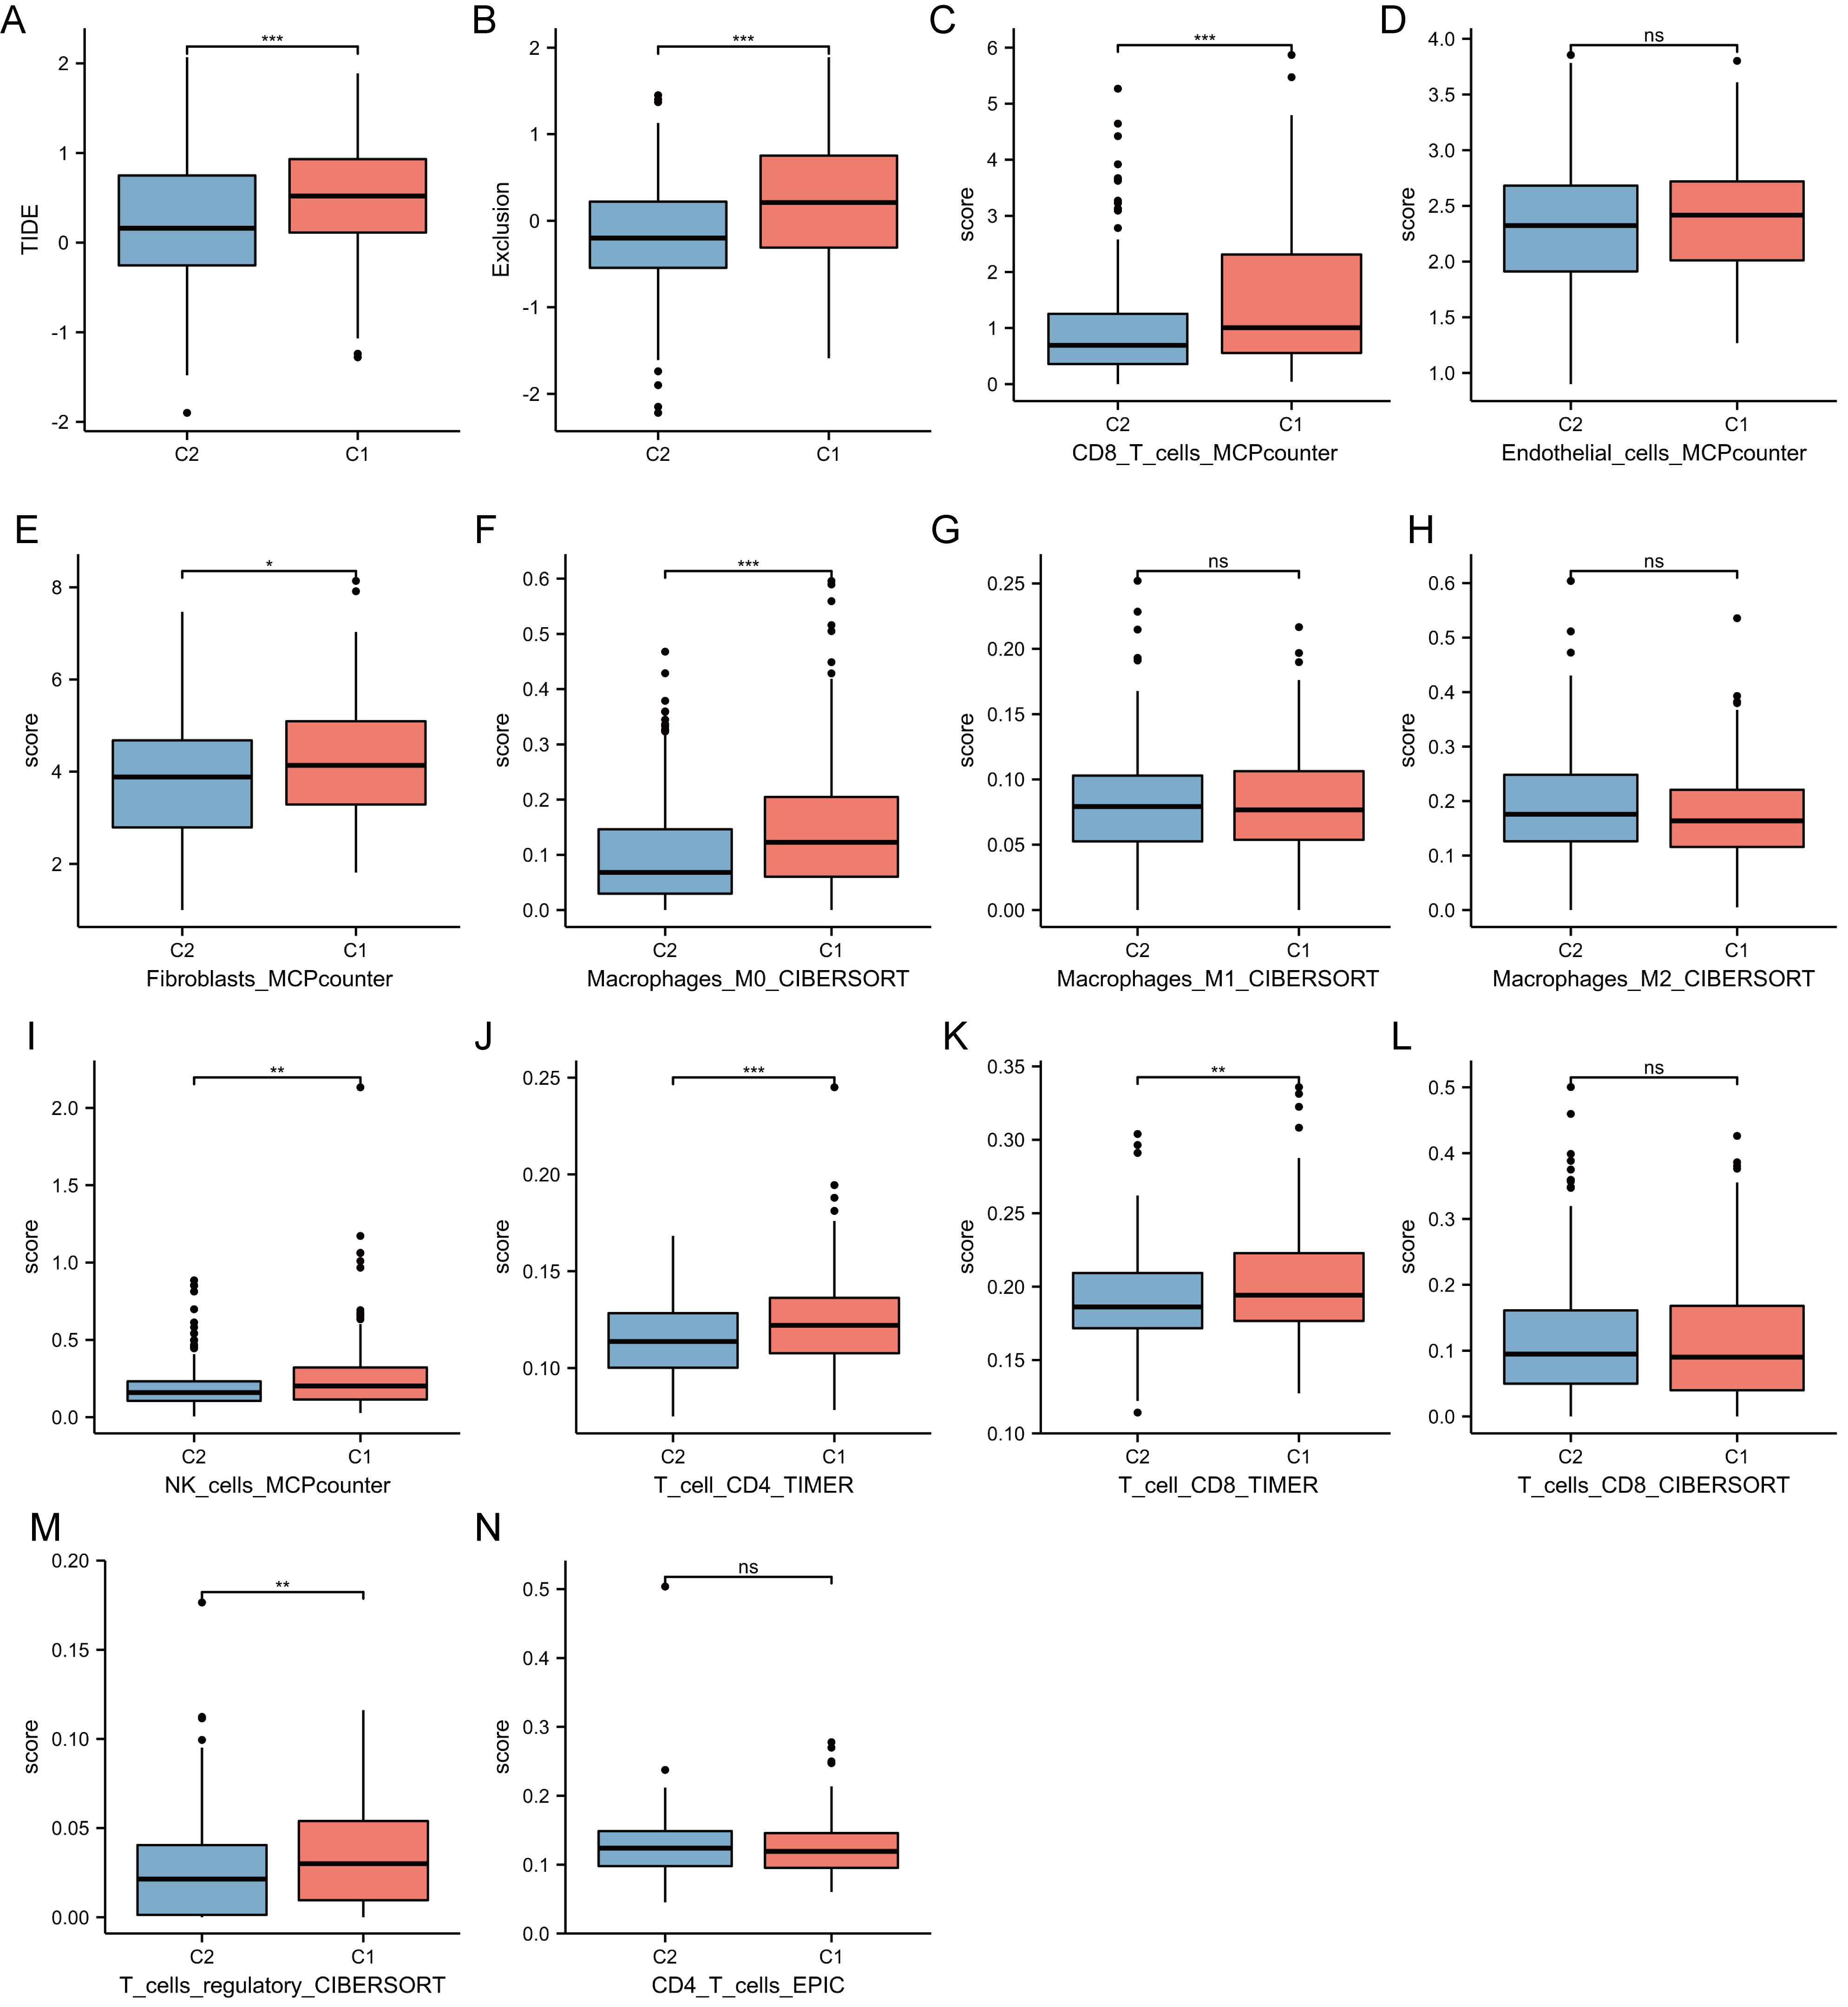


Figure S7. Four evaluation algorithms compare immune characteristics of the two PSM subtypes. Enrichment scores of the Tumor Immune Dysfunction and Exclusion (TIDE) score (A), Exclusion score (B), CD8_T_cells_MCPcounter (C), Endothelial_cells_MCPcounter (D), Fibroblastts_MCPcounter (E), Macrophages_M0_CIBERSORT (F), Macrophag_M1_CIBERSORT (G), Macrophages_M2_CIBERSORT (H), NK_cells_MCPcounter (I), T_cell_CD4_TIMER (J), T_cell_CD8_TIMER (K), T_cells_CD8_CIBERSORT (L), T_cells_regulatory_CIBERSORT (M), and CD4_T_cells_EPIC (N). ns, not significant, *p < 0.05, **p < 0.01, and ***p < 0.001

**Figure S8.**


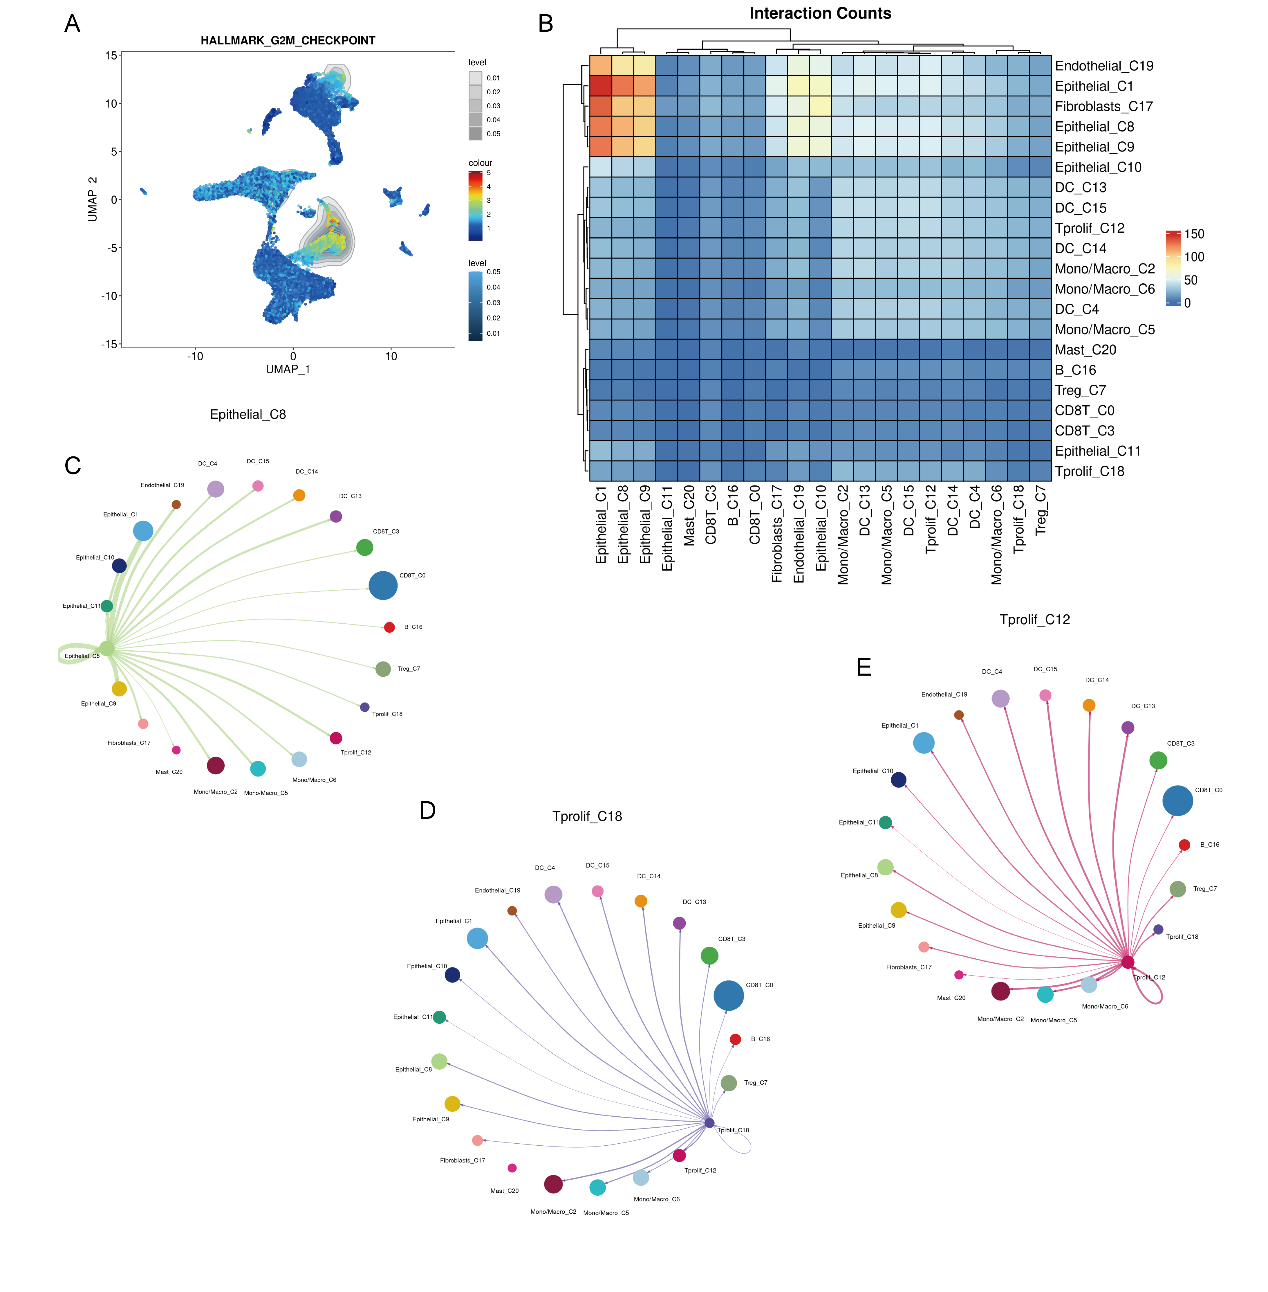


Figure S8. Single-cell profile characteristics of PSM high expression cells. (A) Enrichment score for genes in the Hallmark gene set of each cell, obtained using gene set variation analysis. (B) Ligand–receptor complexes specific to all cell types using TISCH. Red represents a higher likelihood, and blue represents a lower likelihood. (C-E) Interaction network constructed by TISCH for Epithelial_C8 (C), Tprolif_C18 (D), Tprolif_C12 (E).

# Table S1

**Antibodies and Reagents**

| Antibodies and Reagents | Manufacturer, Country, Cat number | Concentration |
| --- | --- | --- |
| PSMD13 Polyclonal Antibody | Thermo Fisher Scientific, US, # PA5-103513 | IHC 1:200  Wb 1:1000 |
| Ki-67 Recombinant Rabbit Monoclonal Antibody | Thermo Fisher Scientific, US, #MA5-14520 | IHC 1:200 |
| Goat Anti-Rabbit IgG H&L (HRP) | Abcam, Cambridge, UK, #ab205718 | IHC 1:200 |
| Dulbecco’s modified Eagle’s medium (DMEM) | Gibco, USA, #8121032 |  |
| Fetal bovine serum (FBS) | Gibco, USA, # 42F1376K |  |
| Plasmid vectors for *PSMD13* | GeneChem, China, #GIEE094416 |  |
| Puromycin | Beyotime Biotechnology, China, # 041321210517 |  |
| Lipofectamine 3000 | Invitrogen, USA, #2395298 |  |
| Recombinant Human EGF  Animal-Free manufactured | Peprotech, USA. #111908 | 20ng/ml |
| Recombinant Human FGF-basic (154 a.a.) | Peprotech, USA. #0820AFC05 | 20ng/ml |
| B27 supplement | Gibco, USA, #2226816 | 2% |

# Table S2

**PSM-related gene information**

| HGNC ID (gene) | Approved symbol | | Approved name | Aliases | Chromosome |
| --- | --- | --- | --- | --- | --- |
| HGNC:9530 | PSMA1 | proteasome 20S subunit alpha 1 | | HC2, NU,PROS30,MGC14542,MGC14575,MGC14751,MGC1667,MGC21459,MGC22853,MGC23915 | 11p15.2 |
| HGNC:9531 | PSMA2 | proteasome 20S subunit alpha 2 | | MU, HC3, PMSA2 | 7p14.1 |
| HGNC:9532 | PSMA3 | proteasome 20S subunit alpha 3 | | HC8 | 14q23.1 |
| HGNC:9533 | PSMA4 | proteasome 20S subunit alpha 4 | | HC9, HsT17706 | 15q25.1 |
| HGNC:9534 | PSMA5 | proteasome 20S subunit alpha 5 | | ZETA | 1p13.3 |
| HGNC:9535 | PSMA6 | proteasome 20S subunit alpha 6 | | IOTA, PROS27,p27K,MGC22756,MGC2333,MGC23846 | 14q13.2 |
| HGNC:9536 | PSMA7 | proteasome 20S subunit alpha 7 | | XAPC7,C6,HSPC,RC6-1 | 20q13.33 |
| HGNC:22985 | PSMA8 | proteasome 20S subunit alpha 8 | | MGC26605,PSMA7L | 18q11.2 |
| HGNC:9537 | PSMB1 | proteasome 20S subunit beta 1 | | PMSB1,HC5 | 6q27 |
| HGNC:9539 | PSMB2 | proteasome 20S subunit beta 2 | | HC7-I | 1p34.3 |
| HGNC:9540 | PSMB3 | proteasome 20S subunit beta 3 | | HC10-II,MGC4147 | 17q12 |
| HGNC:9541 | PSMB4 | proteasome 20S subunit beta 4 | | HN3,PROS26 | 1q21.3 |
| HGNC:9542 | PSMB5 | proteasome 20S subunit beta 5 | | MB1 | 14q11.2 |
| HGNC:9543 | PSMB6 | proteasome 20S subunit beta 6 | | Y,DELTA | 17p13.2 |
| HGNC:9544 | PSMB7 | proteasome 20S subunit beta 7 | | Z | 9q33.3 |
| HGNC:9545 | PSMB8 | proteasome 20S subunit beta 8 | | RING10,D6S216E,PSMB5i,beta5i | 6p21.32 |
| HGNC:9546 | PSMB9 | proteasome 20S subunit beta 9 | | RING12,beta1i,PSMB6i | 6p21.32 |
| HGNC:9538 | PSMB10 | proteasome 20S subunit beta 10 | | LMP10,MGC1665,beta2i | 16q22.1 |
| HGNC:9547 | PSMC1 | proteasome 26S subunit, ATPase 1 | | S4,p56,RPT2 | 14q32.11 |
| HGNC:9548 | PSMC2 | proteasome 26S subunit, ATPase 2 | | MSS1,S7,Nbla10058,RPT1 | 7q22.1 |
| HGNC:9549 | PSMC3 | proteasome 26S subunit, ATPase 3 | | TBP1,TBP-1,RPT5 | 11p11.2 |
| HGNC:9551 | PSMC4 | proteasome 26S subunit, ATPase 4 | | TBP7,S6,MGC8570,MGC13687,MGC23214,TBP-7,RPT3 | 19q13.11-q13.13 |
| HGNC:9552 | PSMC5 | proteasome 26S subunit, ATPase 5 | | SUG1,p45/SUG,TBP10,p45,S8,TRIP1,SUG-1,RPT6 | 17q23.3 |
| HGNC:9553 | PSMC6 | proteasome 26S subunit, ATPase 6 | | p42,RPT5 | 14q22.1 |
| HGNC:9554 | PSMD1 | proteasome 26S subunit, non-ATPase 1 | | S1,P112,Rpn2 | 2q37.1 |
| HGNC:9559 | PSMD2 | proteasome 26S subunit ubiquitin receptor, non-ATPase 2 | | S2,P97,TRAP2,MGC14274,Rpn1 | 3q27.1 |
| HGNC:9560 | PSMD3 | proteasome 26S subunit, non-ATPase 3 | | S3,P58,Rpn3 | 17q21.1 |
| HGNC:9561 | PSMD4 | proteasome 26S subunit ubiquitin receptor, non-ATPase 4 | | S5A,AF-1,AF,Rpn10 | 1q21.3 |
| HGNC:9563 | PSMD5 | proteasome 26S subunit, non-ATPase 5 | | S5B,KIAA0072 | 9q33.2 |
| HGNC:9564 | PSMD6 | proteasome 26S subunit, non-ATPase 6 | | S10,p44S10,KIAA0107,Rpn7 | 3p14.1 |
| HGNC:9565 | PSMD7 | proteasome 26S subunit, non-ATPase 7 | | S12,P40,MOV34,Rpn8 | 16q23.1 |
| HGNC:9566 | PSMD8 | proteasome 26S subunit, non-ATPase 8 | | S14,Nin1p,p31,HIP6,HYPF,Rpn12 | 19q13.2 |
| HGNC:9567 | PSMD9 | proteasome 26S subunit, non-ATPase 9 | | p27,Rpn4 | 12q24.31 |
| HGNC:9555 | PSMD10 | proteasome 26S subunit, non-ATPase 10 | | p28 | Xq22.3 |
| HGNC:9556 | PSMD11 | proteasome 26S subunit, non-ATPase 11 | | S9,p44.5,MGC3844,Rpn6 | 17q11.2 |
| HGNC:9557 | PSMD12 | proteasome 26S subunit, non-ATPase 12 | | p55,Rpn5 | 17q24.2 |
| HGNC:9558 | PSMD13 | proteasome 26S subunit, non-ATPase 13 | | p40.5,Rpn9 | 11p15.5 |
| HGNC:16889 | PSMD14 | proteasome 26S subunit, non-ATPase 14 | | POH1,pad1,Rpn11 | 2q24.2 |
| HGNC:10845 | SEM1 | SEM1 26S proteasome subunit | | DSS1,Shfdg1,ECD,SHSF1,FLJ42280,PSMD15 | 7q21.3 |
| HGNC:15759 | ADRM1 | ADRM1 26S proteasome ubiquitin receptor | | GP110,Rpn13,ARM1,PSMD16 | 20q13.33 |
| HGNC:9568 | PSME1 | proteasome activator subunit 1 | | IFI5111,PA28alpha | 14q12 |
| HGNC:9569 | PSME2 | proteasome activator subunit 2 | | PA28beta | 14q12 |
| HGNC:9570 | PSME3 | proteasome activator subunit 3 | | Ki,PA28-gamma,REG-GAMMA,PA28G | 17q21.31 |
| HGNC:20635 | PSME4 | proteasome activator subunit 4 | | PA200,KIAA0077 | 2p16.2 |
| HGNC:9571 | PSMF1 | proteasome inhibitor subunit 1 | | PI31 | 20p13 |

# References

1. Yao, J., et al., *FBXW11 contributes to stem-cell-like features and liver metastasis through regulating HIC1-mediated SIRT1 transcription in colorectal cancer.* Cell Death Dis, 2021. **12**(10): p. 930.

2. Brunati, M., et al., *The serine protease hepsin mediates urinary secretion and polymerisation of Zona Pellucida domain protein uromodulin.* Elife, 2015. **4**: p. e08887.

3. Kilkenny, C., et al., *Improving bioscience research reporting: the ARRIVE guidelines for reporting animal research.* PLoS Biol, 2010. **8**(6): p. e1000412.

4. Liu, Y.J., et al., *FSTL3 is a Prognostic Biomarker in Gastric Cancer and is Correlated with M2 Macrophage Infiltration.* Onco Targets Ther, 2021. **14**: p. 4099-4117.
